# Supplementary material
Source: PubMed Central journal article supplement (PMC2361393)

**Supplementary Table 1.** Yeast strains

| <b>Strain</b> | <b>Genotype</b>                                                                        | <b>Source/reference</b> |
|---------------|----------------------------------------------------------------------------------------|-------------------------|
| H304          | <i>MATa ura3-52 leu2-3,112</i>                                                         | P. Novick(NY179)        |
| H973          | <i>MATα ura3-52 his4-619</i>                                                           | P. Novick(NY15)         |
| H956          | <i>MATa ura3-52 leu2-3,112 ade2 his4 sec61-2</i>                                       | S. Ferro-Novick(RSY524) |
| H1107         | <i>MATα ura3-52 leu2-3,112 sec63-1 pep4-3</i>                                          | S. Ferro-Novick(RSY151) |
| H1109         | <i>MATα ura3-52 leu2-3,112 his4-619 sec62-1</i>                                        | S. Ferro-Novick(RSY529) |
| H3227         | <i>MATa ura3-52 leu2-3,112 sbh1::HphMX</i>                                             | This study              |
| H3224         | <i>MATa ura3-52 leu2-3,112 sbh2::KanMX4</i>                                            | This study              |
| H3232         | <i>MATa sbh1::KanMX sbh2::HphMX leu2-3,112 ura3-52</i>                                 | This study              |
| H3235         | <i>MATα sbh1::KanMX sbh2::HphMX his4-619 ura3-52</i>                                   | This study              |
| H3384         | <i>MATa ura3-52 leu2-3,112::α-amylase-LEU2</i>                                         | This study              |
| H3386         | <i>MATα ura3-52 leu2-3,112 sbh1::KanMX4<br/>leu2-3,112::α-amylase-LEU2</i>             | This study              |
| H3387         | <i>MATα ura3-52 leu2-3,112 sbh2::HphMX<br/>leu2-3,112::α-amylase-LEU2</i>              | This study              |
| H3388         | <i>MATa ura3-52 leu2-3,112 sbh1::KanMX4 sbh2::HphMX<br/>leu2-3,112::α-amylase-LEU2</i> | This study              |
| H3392         | <i>MATa leu2-3,112 ura3-52 [SEC61-LEU2, 2μ]</i>                                        | This study              |
| H3393         | <i>MATa leu2-3,112 ura3-52 [SSS1-URA3, 2μ]</i>                                         | This study              |
| H3429         | <i>MATa RTN1:3HA-KanMX sbh1::hphMX leu2-3,112 ura3-52</i>                              | This study              |
| H3431         | <i>MATa RTN1::3HA-KanMX leu2-3,112 ura3-52</i>                                         | This study              |
| H3543         | <i>MATa sbh1::KanMX sbh2::HphMX leu2-3,112 ura3-52<br/>trp1::natNT2</i>                | This study              |
| WCG4a         | <i>MATa leu2-3,112 ura3 his3-11,-15</i>                                                | (46)                    |

**Supplementary Table 2.** Yeast expression vectors used in this study

| Plasmid name     | Type    | Promoter    | Insert                 | Marker      | Source     |
|------------------|---------|-------------|------------------------|-------------|------------|
| pVT102U          | 2 $\mu$ | <i>ADH1</i> | -                      | <i>URA3</i> | (25)       |
| YEpsBH1(1-82)    | 2 $\mu$ | <i>ADH1</i> | <i>SBH1</i>            | <i>URA3</i> | This study |
| YEpsBH1(1-54)    | 2 $\mu$ | <i>ADH1</i> | <i>sbh1(1-54)</i>      | <i>URA3</i> | This study |
| YEpsBH1(1-75)    | 2 $\mu$ | <i>ADH1</i> | <i>sbh1(1-75)</i>      | <i>URA3</i> | This study |
| YEpsBH1(34-82)   | 2 $\mu$ | <i>ADH1</i> | <i>sbh1(34-82)</i>     | <i>URA3</i> | This study |
| YEpsBH1(34-75)   | 2 $\mu$ | <i>ADH1</i> | <i>sbh1(34-75)</i>     | <i>URA3</i> | This study |
| YEpsBH1(50-82)   | 2 $\mu$ | <i>ADH1</i> | <i>sbh1(50-82)</i>     | <i>URA3</i> | This study |
| YEpsBH1(50-75)   | 2 $\mu$ | <i>ADH1</i> | <i>sbh1(50-75)</i>     | <i>URA3</i> | This study |
| YEpsBH1(1-82)L   | 2 $\mu$ | <i>ADH1</i> | <i>SBH1</i>            | <i>LEU2</i> | This study |
| YEpsBH1(50-75)L  | 2 $\mu$ | <i>ADH1</i> | <i>sbh1(1-75)</i>      | <i>LEU2</i> | This study |
| YEpsBH2(1-88)L   | 2 $\mu$ | <i>ADH1</i> | <i>sbh2(1-88)</i>      | <i>LEU2</i> | This study |
| p425ADH          | 2 $\mu$ | <i>ADH1</i> | -                      | <i>LEU2</i> | (26)       |
| YEpsBH2(1-88)    | 2 $\mu$ | <i>ADH1</i> | <i>SBH2</i>            | <i>URA3</i> | This study |
| YEpsBH2(57-82)   | 2 $\mu$ | <i>ADH1</i> | <i>sbh2(57-82)</i>     | <i>URA3</i> | This study |
| YEpsSss1         | 2 $\mu$ | <i>ADH1</i> | <i>SSS1</i>            | <i>URA3</i> | This study |
| YEpsSss1TM       | 2 $\mu$ | <i>ADH1</i> | <i>sss1(42-75)</i>     | <i>URA3</i> | This study |
| p426ADH          | 2 $\mu$ | <i>ADH1</i> | -                      | <i>URA3</i> | (26)       |
| YEpsBIO-SBH1     | 2 $\mu$ | <i>ADH1</i> | <i>BIO-SBH1</i>        | <i>URA3</i> | This study |
| YEpsBIO-SBH1TM   | 2 $\mu$ | <i>ADH1</i> | <i>BIO-sbh1(50-75)</i> | <i>URA3</i> | This study |
| YEps $\alpha$ 6  | 2 $\mu$ | <i>ADH1</i> | $\alpha$ -amylase      | <i>LEU2</i> | (27)       |
| YIps $\alpha$ -L | -       | <i>ADH1</i> | $\alpha$ -amylase      | <i>LEU2</i> | This study |

## **Supplementary Materials and Methods**

### **Cell fraction**

Strains H3384 and H3388 were grown in 200 ml of YPD at 30°C overnight to OD<sub>600</sub> 1.5. Cells were harvested, wash once with cold water and once with spheroplasting buffer (1.4M sorbitol, 20mM TEA, 40mM β-mercaptoethanol pH 7.4). Cells were resuspended in spheroplasting buffer with 150 µg /ml zymolyase 100T and digested for 15 min at 37 °C. Spheroplasts were collected and washed once with spheroplasting buffer followed by resuspension in lysis buffer (20mM HEPES, 250mM sucrose, 1mM EGTA, 2mM MgCl<sub>2</sub>, 4mM ABESF) with Complete protein inhibitor cocktail and lysed by pipetting. Lysates were centrifuged at 1000g for 10 min at 4°C, the supernatant taken to new tubes and centrifuged at 10 000g for 20 min at 4°C. This supernatant was centrifuge at 100 000g for 30 min at 4°C . Samples from different stages were subjected to SDS PAGE gel and Western blotting with anti-α-amylase antibodies.

### **Quantitative immunoblotting**

The indicated amount of membranes was resolved by SDS-PAGE, transferred to nitrocellulose membranes, and membranes probed with anti-Sec61p polyclonal antiserum at 1:1000 (our lab), and anti-Mns1p at 1:500 (Annette Herscovics), followed by detection with <sup>125</sup>I-Protein A (Amersham) and autoradiography and quantitation using a phosphorimager (BioRad).

### **Supplementary Figure legends**

#### Supplementary Figure 1

Fast migrating form of alfa amylase in Sbh1 Sbh2 deleted cells is cytosolic. H3232 cells were lysed and subjected to differential centrifugation analysis as described in supplementary materials and methods. Samples of each fraction were analysed by SDS-PAGE and Western blotting with anti α-amylase antibodies.

## Supplementary Figure 2

Mns1p levels are decreased in *sbh1Δ sbh2Δ* cells. (A) Indicated amounts of membranes prepared from H304 or H3232 cells were subjected to SDS PAGE and Western blotting with anti Mns1p or Sec61p antibodies. (B) Quantitation of the proportion of Mns1p to Sec61p in membranes analysed in (A).

## Supplemental Figure 1

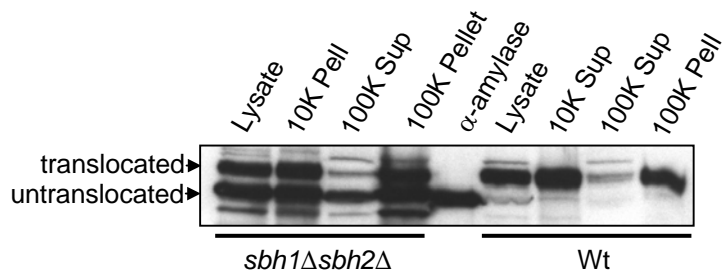

## Supplemental Figure 2

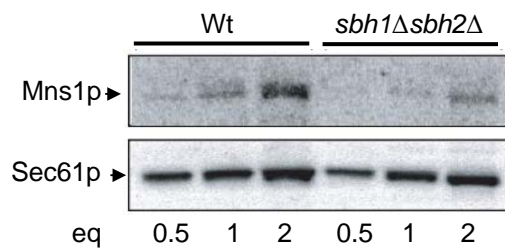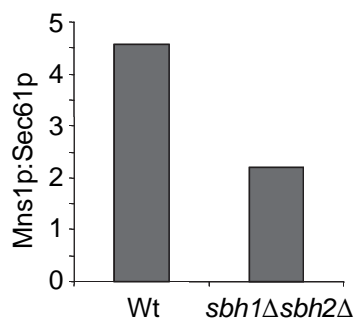

Supplement: NIHMS37983-supplement-supplement.pdf [file NIHMS37983-supplement-supplement.pdf]
